# Supplementary material
Source: PubMed Central journal article supplement (PMC5933097)
Supplement: supptable038.pdf [file supptable038.pdf]

| Approved symbol | Approved name                                                          | HGNC ID    | Location     |
|-----------------|------------------------------------------------------------------------|------------|--------------|
| ABCB11          | ATP binding cassette subfamily B member 11                             | HGNC:42    | 2q24         |
| ADH1B           | alcohol dehydrogenase 1B (class I), beta polypeptide                   | HGNC:250   | 4q23         |
| ADH6            | alcohol dehydrogenase 6 (class V)                                      | HGNC:255   | 4q23         |
| AFP             | alpha fetoprotein                                                      | HGNC:317   | 4q13.3       |
| AGT             | angiotensinogen                                                        | HGNC:333   | 1q42.2       |
| AKT1            | v-akt murine thymoma viral oncogene homolog 1                          | HGNC:391   | 14q32.33     |
| ALDH9A1         | aldehyde dehydrogenase 9 family member A1                              | HGNC:412   | 1q24.1       |
| ALK             | anaplastic lymphoma receptor tyrosine kinase                           | HGNC:427   | 2p23         |
| AMFR            | autocrine motility factor receptor, E3 ubiquitin protein ligase        | HGNC:463   | 16q21        |
| AOC1            | amine oxidase, copper containing 1                                     | HGNC:80    | 7q36.1       |
| BBS5            | Bardet-Biedl syndrome 5                                                | HGNC:970   | 2q31         |
| BRD2            | bromodomain containing 2                                               | HGNC:1103  | 6p21.3       |
| CRH             | corticotropin releasing hormone                                        | HGNC:2355  | 8q13         |
| CRHBP           | corticotropin releasing hormone binding protein                        | HGNC:2356  | 5q13.3       |
| CRHR1           | corticotropin releasing hormone receptor 1                             | HGNC:2357  | 17q21.31     |
| CRHR2           | corticotropin releasing hormone receptor 2                             | HGNC:2358  | 7p14.3       |
| CSMD3           | CUB and Sushi multiple domains 3                                       | HGNC:19291 | 8q23.3       |
| CTNNB1          | catenin beta 1                                                         | HGNC:2514  | 3p21         |
| CYP19A1         | cytochrome P450 family 19 subfamily A member 1                         | HGNC:2594  | 15q21        |
| DDO             | D-aspartate oxidase                                                    | HGNC:2727  | 6q22.1       |
| DRD2            | dopamine receptor D2                                                   | HGNC:3023  | 11q23.2      |
| EEF1G           | eukaryotic translation elongation factor 1 gamma                       | HGNC:3213  | 11q12.3      |
| EPHB2           | EPH receptor B2                                                        | HGNC:3393  | 1p36.1-p35   |
| FLT1            | fms related tyrosine kinase 1                                          | HGNC:3763  | 13q12        |
| FSTL5           | follistatin like 5                                                     | HGNC:21386 | 4q32.3       |
| GRIA1           | glutamate ionotropic receptor AMPA type subunit 1                      | HGNC:4571  | 5q33         |
| GRIA2           | glutamate ionotropic receptor AMPA type subunit 2                      | HGNC:4572  | 4q32.1       |
| GTF2H1          | general transcription factor IIH subunit 1                             | HGNC:4655  | 11p15.1-p14  |
| IGF1            | insulin like growth factor 1                                           | HGNC:5464  | 12q23.2      |
| IGF1R           | insulin like growth factor 1 receptor                                  | HGNC:5465  | 15q26.3      |
| IL6             | interleukin 6                                                          | HGNC:6018  | 7p15.3       |
| IRAK1           | interleukin 1 receptor associated kinase 1                             | HGNC:6112  | Xq28         |
| IRAK1BP1        | interleukin 1 receptor associated kinase 1 binding protein 1           | HGNC:17368 | 6q14.1       |
| KLHL1           | kelch like family member 1                                             | HGNC:6352  | 13q21        |
| MAPK14          | mitogen-activated protein kinase 14                                    | HGNC:6876  | 6p21.3-p21.2 |
| MC2R            | melanocortin 2 receptor                                                | HGNC:6930  | 18p11.2      |
| MTRR            | 5-methyltetrahydrofolate-homocysteine methyltransferase reductase      | HGNC:7473  | 5p15.31      |
| NAA10           | N(alpha)-acetyltransferase 10, NatA catalytic subunit                  | HGNC:18704 | Xq28         |
| NCAM2           | neural cell adhesion molecule 2                                        | HGNC:7657  | 21q21        |
| NFKB1           | nuclear factor of kappa light polypeptide gene enhancer in B-cells 1   | HGNC:7794  | 4q24         |
| NOS1            | nitric oxide synthase 1                                                | HGNC:7872  | 12q24.22     |
| NTS             | neurotensin                                                            | HGNC:8038  | 12q21.31     |
| NTSR1           | neurotensin receptor 1 (high affinity)                                 | HGNC:8039  | 20q13        |
| NTSR2           | neurotensin receptor 2                                                 | HGNC:8040  | 2p25.1       |
| OAZ1            | ornithine decarboxylase antizyme 1                                     | HGNC:8095  | 19p13.3      |
| OR4C6           | olfactory receptor family 4 subfamily C member 6                       | HGNC:14743 | 11q11        |
| OR4P4           | olfactory receptor family 4 subfamily P member 4                       | HGNC:15180 | 11q11        |
| OR4S2           | olfactory receptor family 4 subfamily S member 2                       | HGNC:15183 | 11q11        |
| OXTR            | oxytocin receptor                                                      | HGNC:8529  | 3p25         |
| P4HA2           | prolyl 4-hydroxylase subunit alpha 2                                   | HGNC:8547  | 5q31         |
| PGR             | progesterone receptor                                                  | HGNC:8910  | 11q22-q23    |
| PIK3CG          | phosphatidylinositol-4,5-bisphosphate 3-kinase catalytic subunit gamma | HGNC:8978  | 7q22         |
| PLCB1           | phospholipase C beta 1                                                 | HGNC:15917 | 20p12        |

|         |                                                                                       |            |              |
|---------|---------------------------------------------------------------------------------------|------------|--------------|
| PPIA    | peptidylprolyl isomerase A                                                            | HGNC:9253  | 7p13         |
| PTGS1   | prostaglandin-endoperoxide synthase 1 (prostaglandin G/H synthase and cyclooxygenase) | HGNC:9604  | 9q32-q33.3   |
| PTGS2   | prostaglandin-endoperoxide synthase 2                                                 | HGNC:9605  | 1q25.2-q25.3 |
| RASSF7  | Ras association domain family member 7                                                | HGNC:1166  | 11p15.5      |
| RPL19   | ribosomal protein L19                                                                 | HGNC:10312 | 17q12        |
| RPS6KB1 | ribosomal protein S6 kinase, 70kDa, polypeptide 1                                     | HGNC:10436 | 17q23.1      |
| SDHA    | succinate dehydrogenase complex flavoprotein subunit A                                | HGNC:10680 | 5p15         |
| TLR3    | toll like receptor 3                                                                  | HGNC:11849 | 4q35         |
| TLR7    | toll like receptor 7                                                                  | HGNC:15631 | Xp22.3       |
| TP53    | tumor protein p53                                                                     | HGNC:11998 | 17p13.1      |
| VEGFA   | vascular endothelial growth factor A                                                  | HGNC:12680 | 6p12         |
| ABCF1   | ATP binding cassette subfamily F member 1                                             | HGNC:70    | 6p21.33      |
| ACTB    | actin, beta                                                                           | HGNC:132   | 7p22         |
| ALAS1   | 5'-aminolevulinatase synthase 1                                                       | HGNC:396   | 3p21         |
| B2M     | beta-2-microglobulin                                                                  | HGNC:914   | 15q21.1      |
| CLTC    | clathrin heavy chain                                                                  | HGNC:2092  | 17q23.1      |
| G6PD    | glucose-6-phosphate dehydrogenase                                                     | HGNC:4057  | Xq28         |
| GAPDH   | glyceraldehyde-3-phosphate dehydrogenase                                              | HGNC:4141  | 12p13.31     |
| GUSB    | glucuronidase, beta                                                                   | HGNC:4696  | 7q11.21      |
| HPRT1   | hypoxanthine phosphoribosyltransferase 1                                              | HGNC:5157  | Xq26.2       |
| LDHA    | lactate dehydrogenase A                                                               | HGNC:6535  | 11p15.1      |
| PGK1    | phosphoglycerate kinase 1                                                             | HGNC:8896  | Xq13.3       |
| POLR1B  | polymerase (RNA) I polypeptide B                                                      | HGNC:20454 | 2q13         |
| POLR2A  | polymerase (RNA) II (DNA directed) polypeptide A, 220kDa                              | HGNC:9187  | 17p13.1      |
| RPLP0   | ribosomal protein, large, P0                                                          | HGNC:10371 | 12q24.2      |
| TBP     | TATA-box binding protein                                                              | HGNC:11588 | 6q27         |
| TUBB    | tubulin beta class I                                                                  | HGNC:20778 | 6p21.33      |
